# Supplementary material
Source: PubMed Central journal article supplement (PMC4375081)

# SUPPLEMENTARY DATA

**Supplementary Figure 1.** related to Table 1. Iron parameters in mice fed the different iron diets, measured at ZT10. A) Non-heme iron measurement in the liver (n=8); transcript levels of B) transferrin receptor 1 (n=6), C) hepcidin at ZT14 (n=6), and D) ferritin (n=6). (\*p ≤ .05 compared to HN or 350mg/kg diet).

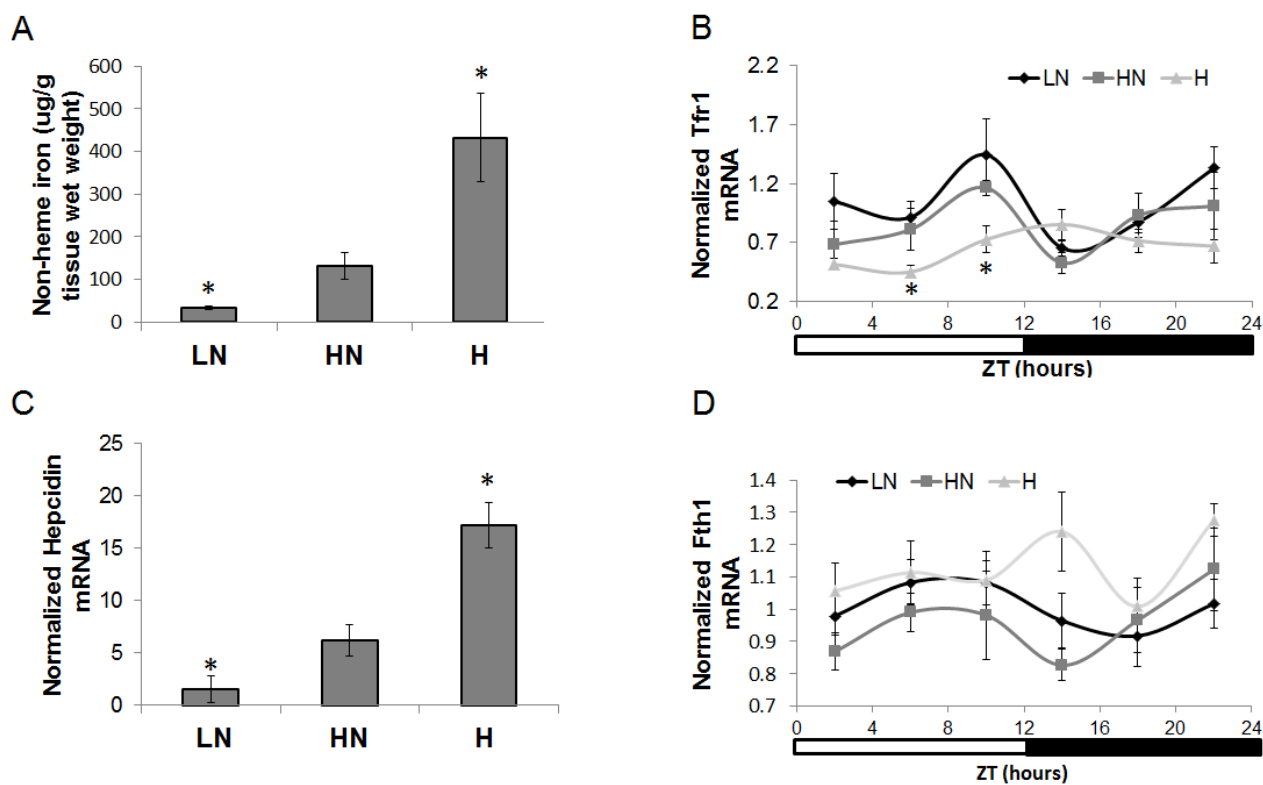

SUPPLEMENTARY DATA

**Supplementary Figure 2.** related to Figure 1. Circadian insulin and food intake in mice fed the different iron diets.. A) *Ad libitum* serum insulin (n=3-6, \*p=.05, LN vs HN p=.04, LN vs H p=.04, HN vs H p=.77). B) Feeding behavior as measured by electronic scale in the Comprehensive Laboratory Animal Monitoring System (CLAMS; Columbus Instruments, Columbus, OH; N=6-8).

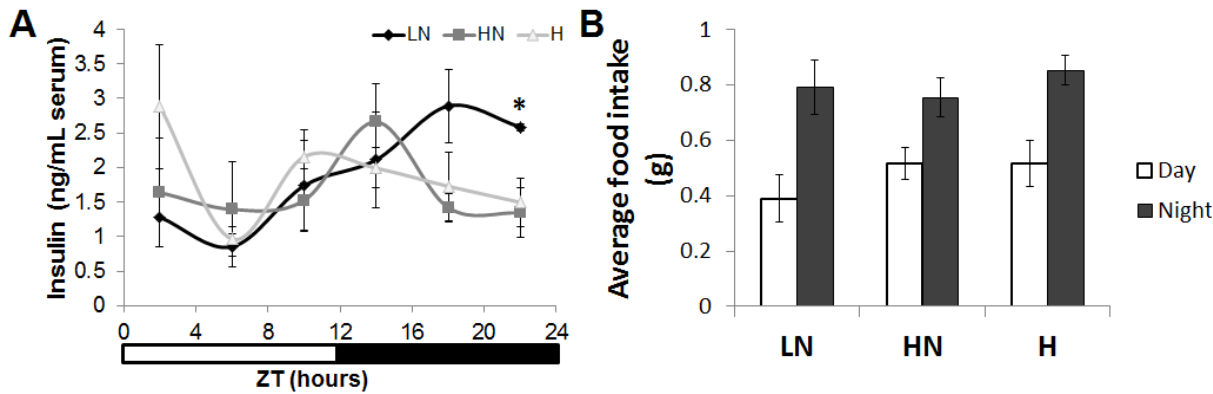

**Supplementary Figure 3.** related to Figure 2 .Assessment of Rev-Erb $\alpha$  and NCOR abundance at ZT14. A) Rev-Erb alpha blot B) quantification (n=4, ZT14) C) NCOR blot and quantification. C) NCOR blot D) quantification (n=5). Transcripts of E) Rev-Erb $\alpha$  and F) NCOR (n=5-6)

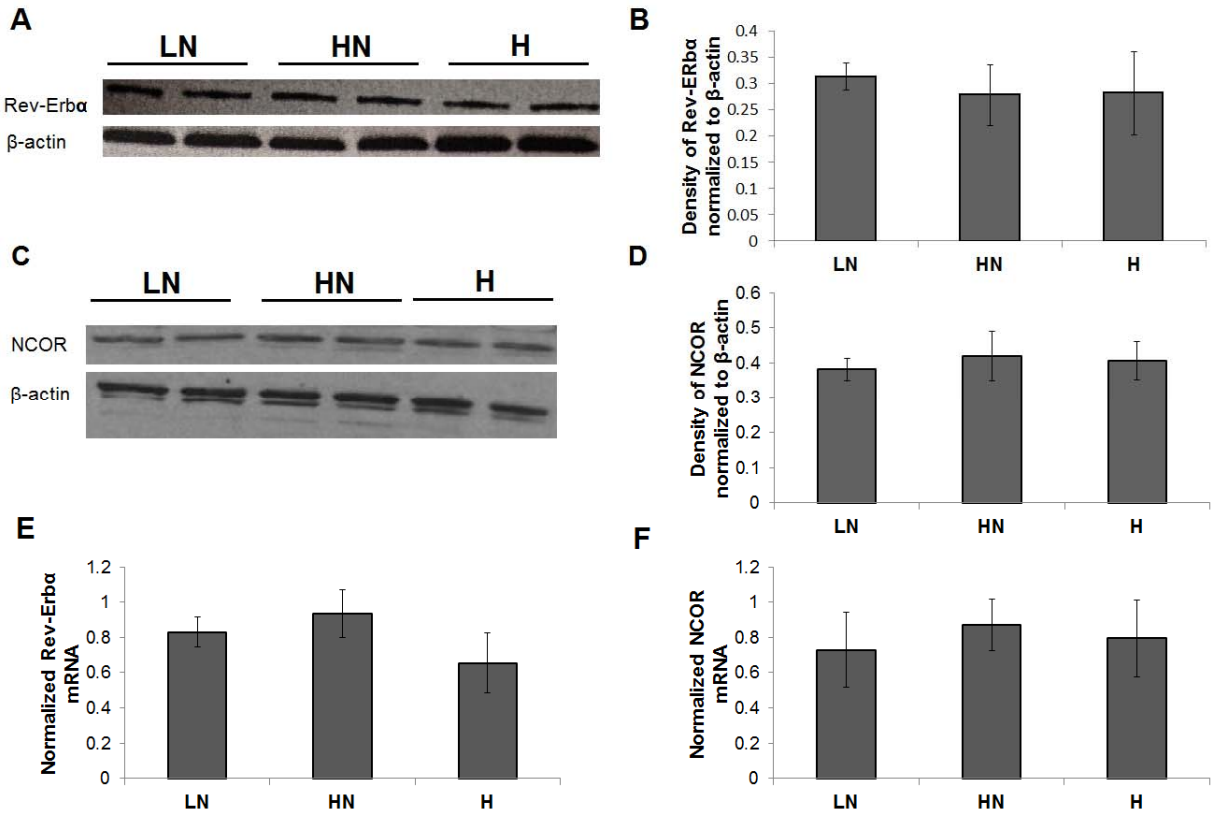

# SUPPLEMENTARY DATA

**Supplementary Figure 4.** related to Figure 3. Hepatic iron and heme oxygenase mRNA in mice fed the different iron diets. A) ZT0 heme measured by HPLC ( $p=.3236$ ); B) ZT0 heme B as measured by Hemochromogen pyridine ( $p=.6361$ ); C) Hmox-1 transcript levels as normalized by RPL13 and cyclophilin B (ZT10  $p=.0289$ , LN vs HN  $p=.3219$ , LN vs H  $p=.2193$ , HN vs H  $p=.0137$ ; ZT14  $p=.0018$ , LN vs HN  $p=.00237$ , LN vs H  $p=.0021$ , HN vs H  $p=.537$ ; ZT18  $p=.0001$ , LN vs HN  $p=.0031$ , LN vs H  $p=.0002$ , HN vs H  $p=.0012$ ). Heme B in D) ALA ( $n=5-8$ ) and E) INH treated groups vs control ( $n=4-9$ )

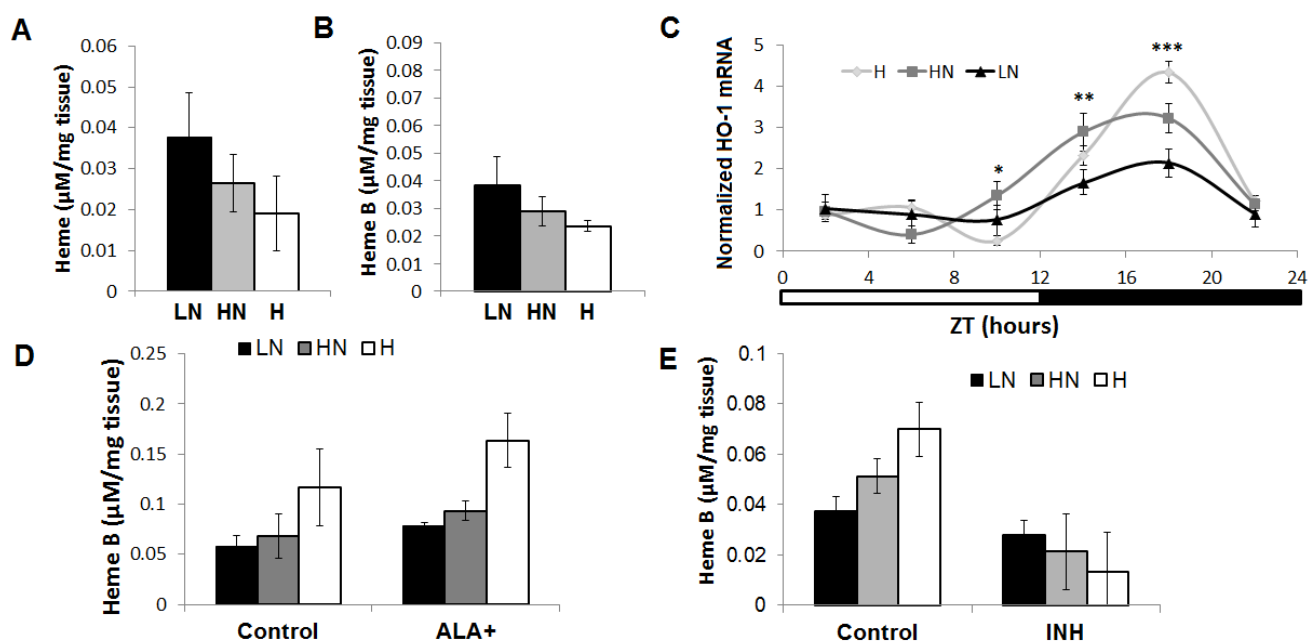

# SUPPLEMENTARY DATA

**Supplementary Figure 5.** related to Figure 5. Regulation of hepatic gluconeogenesis and heme at ZT12 with .05 $\mu$ M hemin supplement to the LN diet A) AUCg for a PTT on mice fed LN or LN+Hemin for 6 weeks (n=6, p=.013). B) Heme B as measured by pyridine hemochromagen assay (n=5-6, p=.021). C) PEPCK mRNA (n=6, p $\leq$  .001) and D) G6Pase mRNA normalized to RPL13 and CyB (n=6, p $\leq$  .001). \*p $\leq$  .05, \*\*p $\leq$  .01, and \*\*\*p $\leq$  .001

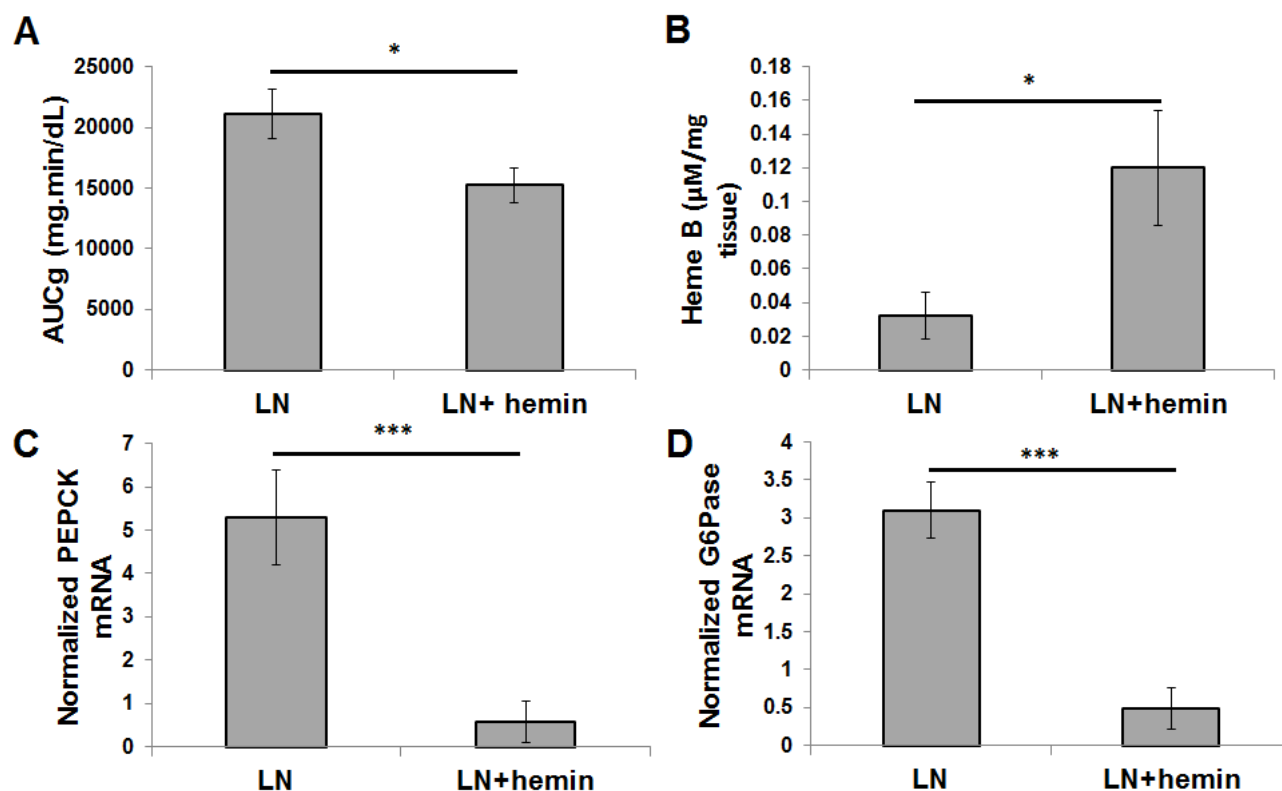

SUPPLEMENTARY DATA

**Supplementary Figure 6.** related to Figure 5. Circadian expression of gluconeogenic genes in HepG2 cells. A) Circadian expression of PEPCK and B) G6Pase in DXS shocked HepG2 cells (n=18) in control, FAC, and deferoxamine.

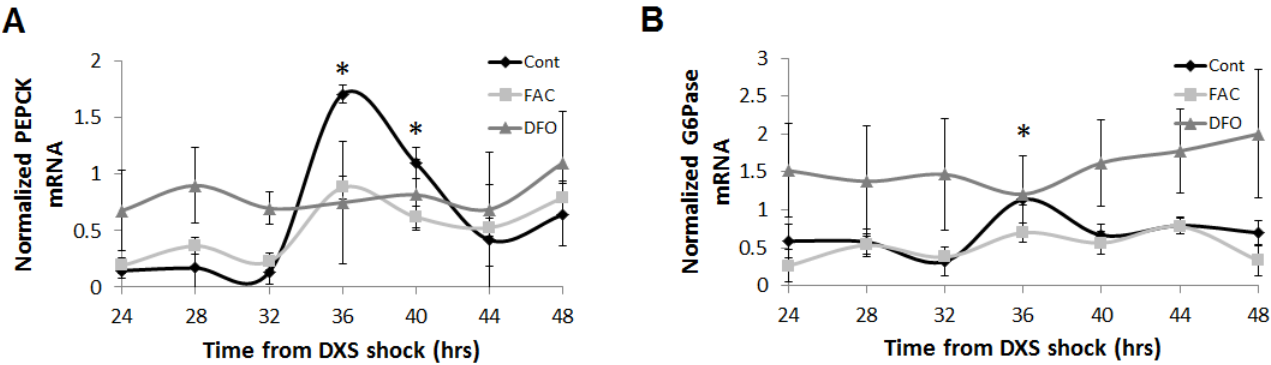

**Supplementary Figure 7.** related to Figure 7 Circadian expression of hepatic transcripts sensitive to oxidative stress in mice fed LN, HN, and H iron diet A) Superoxide dismutase 1 (SOD1) and B) Catalase (n=6)(\*p  $\leq$  .05, \*\*p  $\leq$  .01, and \*\*\*p  $\leq$  .001)

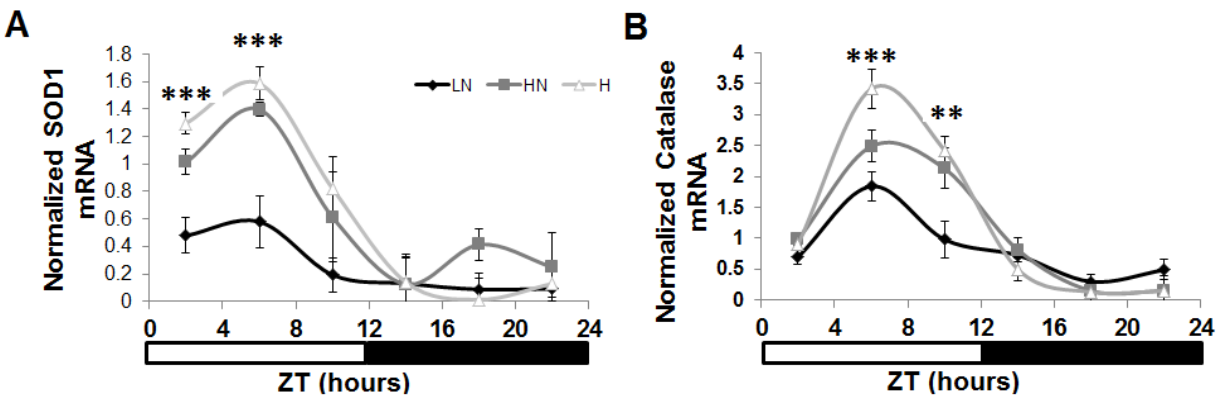

Supplement: supp_db14-0646_DB140646SupplementaryData.pdf [file supp_db14-0646_DB140646SupplementaryData.pdf]
